# Supplementary material
Source: PubMed Central journal article supplement (PMC8509637)

| Division              | Category                | Gene Symbol   | Gene Name                                                  | Intensity-based absolute quantification (iBAQ) |            |             |
|-----------------------|-------------------------|---------------|------------------------------------------------------------|------------------------------------------------|------------|-------------|
|                       |                         |               |                                                            | UBM Lot 1                                      | UBM Lot 2  | UBM Lot 3   |
| Core matrixsome       | Collagens               | COL1A1        | collagen, type I, alpha 1                                  | 2391790000                                     | 2237640000 | 2328650000  |
| Core matrixsome       | Collagens               | COL3A1        | collagen, type III, alpha 1                                | 1416000000                                     | 1448600000 | 13937000000 |
| Core matrixsome       | Collagens               | COL1A2        | collagen, type I, alpha 2                                  | 9774400000                                     | 9711600000 | 9697600000  |
| Core matrixsome       | Collagens               | COL4A2        | collagen, type IV, alpha 2                                 | 6135200000                                     | 6507300000 | 6461900000  |
| Core matrixsome       | Collagens               | COL6A2        | collagen, type VI, alpha 2                                 | 2199400000                                     | 2370400000 | 2102100000  |
| Core matrixsome       | Collagens               | COL6A3        | collagen, type VI, alpha 3                                 | 1974500000                                     | 1947900000 | 1868200000  |
| Core matrixsome       | Proteoglycans           | DCN           | decorin                                                    | 1585000000                                     | 1954400000 | 1323800000  |
| Core matrixsome       | Collagens               | COL14A1       | collagen, type XIV, alpha 1                                | 133414000                                      | 145773400  | 130917600   |
| Core matrixsome       | Proteoglycans           | LUM           | lumican                                                    | 1264400000                                     | 1134600000 | 1074700000  |
| Core matrixsome       | Collagens               | COL5A2        | collagen, type V, alpha 2                                  | 1002700000                                     | 950610000  | 1082600000  |
| Core matrixsome       | Collagens               | COL6A1        | collagen, type VI, alpha 1                                 | 863970000                                      | 806880000  | 875620000   |
| Core matrixsome       | ECM Glycoproteins       | DPT           | dermatopontin                                              | 615200000                                      | 636140000  | 607250000   |
| Core matrixsome       | ECM Glycoproteins       | MFP2          | microfibrillar-associated protein                          | 541170000                                      | 636780000  | 614090000   |
| Core matrixsome       | Proteoglycans           | PRELP         | proline/arginine-rich end leucine-rich repeat prote        | 522630000                                      | 574560000  | 566630000   |
| Core matrixsome       | ECM Glycoproteins       | TGFB1         | transforming growth factor, beta-induced, 68kD             | 287427000                                      | 274829000  | 262947000   |
| Core matrixsome       | Collagens               | COL5A1        | collagen, type V, alpha 1                                  | 438900000                                      | 424660000  | 375700000   |
| Core matrixsome       | Collagens               | COL5A3        | collagen, type V, alpha 3                                  | 416740000                                      | 606570000  | 554120000   |
| Core matrixsome       | Proteoglycans           | BGN           | biglycan                                                   | 397690000                                      | 591640000  | 375190000   |
| Core matrixsome       | ECM Glycoproteins       | FBG           | fibrinogen beta chain                                      | 395310000                                      | 328210000  | 307710000   |
| Core matrixsome       | ECM Glycoproteins       | FGG           | fibrinogen gamma chain                                     | 328020000                                      | 306950000  | 286410000   |
| Core matrixsome       | ECM Glycoproteins       | FGA           | fibrinogen alpha chain                                     | 287427000                                      | 274829000  | 262947000   |
| Core matrixsome       | ECM Glycoproteins       | FN1           | fibronectin 1                                              | 277420000                                      | 245770000  | 205270000   |
| Core matrixsome       | Proteoglycans           | HSPG2         | heparan sulfate proteoglycan                               | 260520000                                      | 255400000  | 214790000   |
| Core matrixsome       | ECM Glycoproteins       | ELN           | elastin                                                    | 242714000                                      | 196395000  | 143452000   |
| Core matrixsome       | ECM Glycoproteins       | FBLN5         | fibulin 5                                                  | 217050000                                      | 164530000  | 125420000   |
| Core matrixsome       | Collagens               | COL4A1        | collagen, type IV, alpha 1                                 | 171380000                                      | 120320000  | 911260000   |
| Core matrixsome       | ECM Glycoproteins       | TGFB1         | transforming growth factor, beta-induced, 68kD             | 169780000                                      | 140560000  | 147590000   |
| Core matrixsome       | ECM Glycoproteins       | EMILIN1       | elastin microfibril interfacer                             | 152610000                                      | 163880000  | 182650000   |
| Core matrixsome       | ECM Glycoproteins       | POSTN         | periostin, osteoblast specific factor                      | 125000000                                      | 172830000  | 146250000   |
| Core matrixsome       | ECM Glycoproteins       | FBLN1         | fibulin 1                                                  | 103625000                                      | 95578000   | 91747000    |
| Core matrixsome       | Proteoglycans           | HAPLN1        | hyaluronan and proteoglycan link protein                   | 95517000                                       | 181960000  | 150690000   |
| Core matrixsome       | Proteoglycans           | FMOD          | fibromodulin                                               | 9161000                                        | 104940000  | 39132000    |
| Core matrixsome       | Collagens               | COL6A5        | collagen, type XXIX, alpha 1                               | 8848500                                        | 119480000  | 125270000   |
| Core matrixsome       | Collagens               | COL18A1       | collagen, type XVIII, alpha 1                              | 3028000                                        | 63755000   | 10767000    |
| Core matrixsome       | Collagens               | COL11A2       | collagen, type XI, alpha 2                                 | 2840300                                        | 33277000   | 64385000    |
| Core matrixsome       | ECM Glycoproteins       | EFEMP1        | EGF-containing fibulin-like extracellular matrix protein   | 2634900                                        | 2142800    | 2020900     |
| Core matrixsome       | Collagens               | COL4A5        | collagen, type IV, alpha 5                                 | 2503900                                        | 1494900    | 2458300     |
| Core matrixsome       | ECM Glycoproteins       | ECM1          | extracellular matrix protein                               | 2280700                                        | 1679500    | 8689500     |
| Core matrixsome       | ECM Glycoproteins       | LAMB2         | laminin, beta 2 (laminin S)                                | 2113800                                        | 3008000    | 1766300     |
| Core matrixsome       | ECM Glycoproteins       | VTN           | vitronectin                                                | 1789600                                        | 0          | 3942200     |
| Core matrixsome       | ECM Glycoproteins       | LAMA4         | laminin, alpha 4                                           | 1749900                                        | 1326600    | 944180      |
| Core matrixsome       | Collagens               | COL8A1        | collagen, type VIII, alpha 1                               | 1558900                                        | 261970     | 435010      |
| Core matrixsome       | ECM Glycoproteins       | NID2          | nidogen 2 (osteonidogen)                                   | 1195600                                        | 1235100    | 789720      |
| Core matrixsome       | ECM Glycoproteins       | NID1          | nidogen 1                                                  | 938510                                         | 2586100    | 660180      |
| Core matrixsome       | Collagens               | COL4A6        | collagen, type IV, alpha 6                                 | 676620                                         | 418940     | 276320      |
| Core matrixsome       | ECM Glycoproteins       | AEBP1         | AE binding protein 1                                       | 656480                                         | 0          | 834220      |
| Core matrixsome       | Collagens               | COL12A1       | collagen, type XII, alpha 1                                | 563730                                         | 1532800    | 823520      |
| Core matrixsome       | ECM Glycoproteins       | VWA1          | von Willebrand factor A domain containing                  | 554840                                         | 544980     | 168600      |
| Core matrixsome       | ECM Glycoproteins       | SRPX          | sushi-repeat-containing protein, X-link                    | 492310                                         | 493570     | 740680      |
| Core matrixsome       | Collagens               | COL9A1        | collagen, type IX, alpha 1                                 | 407680                                         | 0          | 0           |
| Core matrixsome       | Collagens               | COL21A1       | collagen, type XXI, alpha 1                                | 333690                                         | 304950     | 0           |
| Core matrixsome       | Collagens               | COL15A1       | collagen, type XV, alpha 1                                 | 289340                                         | 244850     | 0           |
| Core matrixsome       | Collagens               | COL7A1        | collagen, type VII, alpha 1                                | 234710                                         | 229370     | 269550      |
| Core matrixsome       | Proteoglycans           | HAPLN3        | hyaluronan and proteoglycan link protein                   | 180660                                         | 842310     | 507670      |
| Core matrixsome       | ECM Glycoproteins       | VWF           | von Willebrand factor                                      | 41835                                          | 38275      | 100980      |
| Core matrixsome       | ECM Glycoproteins       | EFEMP2        | EGF-containing fibulin-like extracellular matrix protein   | 0                                              | 141890     | 98383       |
| Core matrixsome       | ECM Glycoproteins       | LAMB1         | laminin, beta 1                                            | 0                                              | 104890     | 0           |
| Core matrixsome       | Proteoglycans           | VCAN          | versican                                                   | 0                                              | 243270     | 289620      |
| Matrixsome-associatec | ECM Regulators          | TGM2          | transglutaminase 2 (C polypeptide, protein-glutamine-g     | 181150000                                      | 198050000  | 179510000   |
| Matrixsome-associatec | ECM-affiliated Proteins | ANXA2         | annexin A2                                                 | 85688000                                       | 71799000   | 77386000    |
| Matrixsome-associatec | ECM Regulators          | SERPINH1      | serpin peptidase inhibitor, clade H (heat shock protein-4  | 48190000                                       | 58407000   | 46865000    |
| Matrixsome-associatec | ECM-affiliated Proteins | LGALS1        | lectin, galactoside-binding, soluble, 1                    | 43699000                                       | 25088000   | 21917000    |
| Matrixsome-associatec | ECM-affiliated Proteins | ANXA6         | annexin A6                                                 | 31896000                                       | 31083000   | 27295000    |
| Matrixsome-associatec | ECM-affiliated Proteins | ANXA5         | annexin A5                                                 | 29478000                                       | 28307000   | 27323000    |
| Matrixsome-associatec | ECM-affiliated Proteins | LGALS3        | lectin, galactoside-binding, soluble, 3                    | 29443000                                       | 20174000   | 16216000    |
| Matrixsome-associatec | ECM Regulators          | HRG           | histidine-rich glycoprotein                                | 19650000                                       | 17568000   | 15007000    |
| Matrixsome-associatec | ECM-affiliated Proteins | ANXA1         | annexin A1                                                 | 15903000                                       | 16825000   | 13013000    |
| Matrixsome-associatec | Secreted Factors        | S100A10       | S100 calcium binding protein A1c                           | 10087000                                       | 4271800    | 5884200     |
| Matrixsome-associatec | ECM Regulators          | PLG           | plasminogen                                                | 5026480                                        | 3054000    | 3606900     |
| Matrixsome-associatec | ECM-affiliated Proteins | CELC3B        | C-type lectin domain family 3, member 3                    | 2017900                                        | 5556000    | 3462900     |
| Matrixsome-associatec | ECM-affiliated Proteins | ANXA11        | annexin A11                                                | 1917100                                        | 2222900    | 833870      |
| Matrixsome-associatec | Secreted Factors        | S100A16       | S100 calcium binding protein A1f                           | 1487400                                        | 2185300    | 823380      |
| Matrixsome-associatec | ECM Regulators          | ITIH2         | inter-alpha (globulin) inhibitor H2                        | 941630                                         | 618420     | 399370      |
| Matrixsome-associatec | ECM Regulators          | ITIH1         | inter-alpha (globulin) inhibitor H1                        | 857120                                         | 207060     | 694950      |
| Matrixsome-associatec | ECM Regulators          | ITIH4         | inter-alpha (globulin) inhibitor H4 (plasma Kallikrein-sen | 581200                                         | 1076500    | 645610      |
| Matrixsome-associatec | ECM Regulators          | P4HA1         | prolyl 4-hydroxylase, alpha polypeptide                    | 544600                                         | 0          | 553520      |
| Matrixsome-associatec | ECM Regulators          | SERPINC1      | serpin peptidase inhibitor, clade C (antithrombin), mem    | 458940                                         | 284950     | 137160      |
| Matrixsome-associatec | ECM-affiliated Proteins | ANXA7         | annexin A7                                                 | 441480                                         | 0          | 0           |
| Matrixsome-associatec | ECM-affiliated Proteins | ANXA4         | annexin A4                                                 | 187060                                         | 0          | 0           |
| Matrixsome-associatec | ECM Regulators          | SERPINF1      | serpin peptidase inhibitor, clade F (alpha-2 antiplasmin,  | 156150                                         | 402780     | 241140      |
| Matrixsome-associatec | ECM-affiliated Proteins | C1QTNF5       | C1q and tumor necrosis factor related protein 5            | 0                                              | 856620     | 1618500     |
| Non-Matrixsome        | Non-Matrixsome          | ACTC1         | actin, cytoplasmic, thymosin beta 4-binding                | 4319700000                                     | 3475300000 | 3015400000  |
| Non-Matrixsome        | Non-Matrixsome          | DES           | desmin                                                     | 1737600000                                     | 1279800000 | 1130200000  |
| Non-Matrixsome        | Non-Matrixsome          | HIST1H2AF     | histone H2A family class 2F, variant F                     | 788020000                                      | 677190000  | 678970000   |
| Non-Matrixsome        | Non-Matrixsome          | HBA1          | histone H1 family class B, member A1                       | 707310000                                      | 1037300000 | 706010000   |
| Non-Matrixsome        | Non-Matrixsome          | ACTG1         | actin, gamma 1                                             | 7035000000                                     | 6532400000 | 6002600000  |
| Non-Matrixsome        | Non-Matrixsome          | LOC102161782  | LOC102161782                                               | 657710000                                      | 572070000  | 517980000   |
| Non-Matrixsome        | Non-Matrixsome          | MYH11         | myosin heavy chain 11                                      | 6237900000                                     | 5723200000 | 4725400000  |
| Non-Matrixsome        | Non-Matrixsome          | HBB           | hemoglobin subunit beta                                    | 4633700000                                     | 6124300000 | 4382300000  |
| Non-Matrixsome        | Non-Matrixsome          | TAGLN         | tropomyosin 1                                              | 4451200000                                     | 3321400000 | 3480700000  |
| Non-Matrixsome        | Non-Matrixsome          | MYL6          | myosin light chain 6                                       | 3507100000                                     | 2901300000 | 2970300000  |
| Non-Matrixsome        | Non-Matrixsome          | MYL9          | myosin light chain 9                                       | 3495800000                                     | 2084400000 | 1562600000  |
| Non-Matrixsome        | Non-Matrixsome          | HIST1H1C      | histone H1 family class 1, member 1C                       | 278298000                                      | 261724000  | 254918000   |
| Non-Matrixsome        | Non-Matrixsome          | VIM           | vimentin                                                   | 2118600000                                     | 1530000000 | 1457100000  |
| Non-Matrixsome        | Non-Matrixsome          | TPM2          | tropomyosin 2                                              | 1926000000                                     | 1705100000 | 1425200000  |
| Non-Matrixsome        | Non-Matrixsome          | CANV1         | canonin A                                                  | 1778200000                                     | 1479400000 | 1475500000  |
| Non-Matrixsome        | Non-Matrixsome          | CNN1          | connexin 36                                                | 1433500000                                     | 858580000  | 677770000   |
| Non-Matrixsome        | Non-Matrixsome          | ACTN1         | actin, thymosin beta 4-binding                             | 1301400000                                     | 868160000  | 867400000   |
| Non-Matrixsome        | Non-Matrixsome          | HSP27         | heat shock protein 27                                      | 1268900000                                     | 1112700000 | 946340000   |
| Non-Matrixsome        | Non-Matrixsome          | TPM1          | tropomyosin 1                                              | 1254100000                                     | 964340000  | 775030000   |
| Non-Matrixsome        | Non-Matrixsome          | TMSB4X        | tropomyosin beta chain 4                                   | 1163900000                                     | 1121900000 | 804860000   |
| Non-Matrixsome        | Non-Matrixsome          | IGLL5         | immunoglobulin light chain 5                               | 1144600000                                     | 1441400000 | 961270000   |
| Non-Matrixsome        | Non-Matrixsome          | FLNA          | follin 1                                                   | 1123200000                                     | 573580000  | 614920000   |
| Non-Matrixsome        | Non-Matrixsome          | HSPB6         | heat shock protein beta 6                                  | 1100900000                                     | 612960000  | 600410000   |
| Non-Matrixsome        | Non-Matrixsome          | TUBA1B        | tubulin alpha 1B                                           | 1079000000                                     | 954190000  | 897900000   |
| Non-Matrixsome        | Non-Matrixsome          | TUBB2A        | tubulin beta 2A                                            | 966390000                                      | 960070000  | 773690000   |
| Non-Matrixsome        | Non-Matrixsome          | CSRP1         | connective tissue repressin 1                              | 863930000                                      | 822830000  | 305500000   |
| Non-Matrixsome        | Non-Matrixsome          | CAV1          | caveolin 1                                                 | 807390000                                      | 636360000  | 418410000   |
| Non-Matrixsome        | Non-Matrixsome          | IRF9          | interferon regulatory factor 9                             | 712850000                                      | 590560000  | 715800000   |
| Non-Matrixsome        | Non-Matrixsome          | FHL1C         | follin-like 1C                                             | 706910000                                      | 535540000  | 436690000   |
| Non-Matrixsome        | Non-Matrixsome          | YWHAZ         | yeast whey acidic protein                                  | 699550000                                      | 803900000  | 650680000   |
| Non-Matrixsome        | Non-Matrixsome          | EEF1A1        | eukaryotic elongation factor 1A1                           | 641410000                                      | 559700000  | 470670000   |
| Non-Matrixsome        | Non-Matrixsome          | MYLK          | myosin light chain kinase                                  | 63237470                                       | 47001000   | 38208000    |
| Non-Matrixsome        | Non-Matrixsome          | MYH10         | myosin heavy chain 10                                      | 564977000                                      | 401800000  | 360590000   |
| Non-Matrixsome        | Non-Matrixsome          | CKB           | creatine kinase B                                          | 556170000                                      | 450340000  | 380770000   |
| Non-Matrixsome        | Non-Matrixsome          | CALM1         | calmodulin 1                                               | 515880000                                      | 472270000  | 473800000   |
| Non-Matrixsome        | Non-Matrixsome          | HSP90AA1      | heat shock protein 90 alpha class A1                       | 498260000                                      | 382470000  | 346420000   |
| Non-Matrixsome        | Non-Matrixsome          | MYH9          | myosin heavy chain 9                                       | 497420000                                      | 426690000  | 424060000   |
| Non-Matrixsome        | Non-Matrixsome          | YWHAE         | yeast whey acidic protein E                                | 458730000                                      | 332190000  | 346550000   |
| Non-Matrixsome        | Non-Matrixsome          | PKM           | pyruvate kinase, muscle                                    | 45564710                                       | 39764940   | 36976000    |
| Non-Matrixsome        | Non-Matrixsome          | FLNC          | follin-like 1C                                             | 417570000                                      | 295550000  | 275390000   |
| Non-Matrixsome        | Non-Matrixsome          | YWHAB         | yeast whey acidic protein B                                | 410470000                                      | 325420000  | 242540000   |
| Non-Matrixsome        | Non-Matrixsome          | PGM5          | phosphoglycerate mutase 5                                  | 388160000                                      | 285170000  | 262770000   |
| Non-Matrixsome        | Non-Matrixsome          | H1FO          | histone H1 family class 1, member FO                       | 378880000                                      | 331760000  | 132890000   |
| Non-Matrixsome        | Non-Matrixsome          | ALB           | albumin                                                    | 337290000                                      | 275980000  | 223770000   |
| Non-Matrixsome        | Non-Matrixsome          | RPL18         | ribosomal protein L18                                      | 320150000                                      | 260300000  | 423060000   |
| Non-Matrixsome        | Non-Matrixsome          | LOC1010515934 | LOC1010515934                                              | 289800000                                      | 251060000  | 204060000   |
| Non-Matrixsome        | Non-Matrixsome          | ACTA2         | actin, thymosin beta 4-binding                             | 281150000                                      | 175770000  | 118360000   |
| Non-Matrixsome        | Non-Matrixsome          | HIST1H1D      | histone H1 family class 1, member 1D                       | 270750000                                      | 239270000  | 224590000   |
| Non-Matrixsome        | Non-Matrixsome          | IGHG          | immunoglobulin heavy chain gamma                           | 267930000                                      | 420920000  | 221590000   |
| Non-Matrixsome        | Non-Matrixsome          | ACTG2         | actin, gamma 2                                             | 259220000                                      | 100080000  | 138400000   |
| Non-Matrixsome        | Non-Matrixsome          | COFILIN       | cofilin                                                    | 256620000                                      | 147150000  | 182370000   |
| Non-Matrixsome        | Non-Matrixsome          |               |                                                            |                                                |            |             |

|               |               |              |          |          |          |
|---------------|---------------|--------------|----------|----------|----------|
| Non-Matrisome | Non-Matrisome | UBA52        | 23612000 | 31270000 | 22391000 |
| Non-Matrisome | Non-Matrisome | HMG1         | 23607000 | 16240000 | 18854000 |
| Non-Matrisome | Non-Matrisome | CALD1        | 22980000 | 17630000 | 15558000 |
| Non-Matrisome | Non-Matrisome | YCL          | 21588000 | 15449000 | 17474000 |
| Non-Matrisome | Non-Matrisome | PRDX1        | 21407000 | 12103000 | 15125000 |
| Non-Matrisome | Non-Matrisome | THY1         | 19265000 | 24598000 | 17440000 |
| Non-Matrisome | Non-Matrisome | PDLIM7       | 19106000 | 19303000 | 12003000 |
| Non-Matrisome | Non-Matrisome | H2AFZ        | 19011000 | 8492900  | 4874300  |
| Non-Matrisome | Non-Matrisome | PF1B         | 18813600 | 11217800 | 19385400 |
| Non-Matrisome | Non-Matrisome | LOC100739030 | 18348000 | 16752000 | 9568000  |
| Non-Matrisome | Non-Matrisome | TUBB4B       | 17899000 | 16015000 | 13296000 |
| Non-Matrisome | Non-Matrisome | LOC100825477 | 17743000 | 26882000 | 24604000 |
| Non-Matrisome | Non-Matrisome | YWHAQ        | 17305000 | 13581000 | 11248000 |
| Non-Matrisome | Non-Matrisome | YWHAH        | 17089000 | 17765000 | 19560000 |
| Non-Matrisome | Non-Matrisome | LOC100524254 | 16809000 | 14034000 | 10766000 |
| Non-Matrisome | Non-Matrisome | HSP70.2      | 15943000 | 9450800  | 10225000 |
| Non-Matrisome | Non-Matrisome | EHD2         | 15763000 | 15250000 | 10445000 |
| Non-Matrisome | Non-Matrisome | RPS18        | 15560000 | 26872000 | 16557000 |
| Non-Matrisome | Non-Matrisome | KRT19        | 15461000 | 11258000 | 22870000 |
| Non-Matrisome | Non-Matrisome | DYNLL1       | 15136000 | 17411000 | 25895000 |
| Non-Matrisome | Non-Matrisome | PFN1         | 14412000 | 17579000 | 10335000 |
| Non-Matrisome | Non-Matrisome | SYNM         | 14183000 | 8502400  | 6138800  |
| Non-Matrisome | Non-Matrisome | RAP1A        | 13840000 | 7395800  | 7615500  |
| Non-Matrisome | Non-Matrisome | PRR12        | 13802000 | 20659000 | 18833000 |
| Non-Matrisome | Non-Matrisome | ACTN4        | 13277000 | 9667200  | 8986600  |
| Non-Matrisome | Non-Matrisome | RPS25        | 13264000 | 11055000 | 11037000 |
| Non-Matrisome | Non-Matrisome | APOA1        | 13116000 | 11844000 | 11318000 |
| Non-Matrisome | Non-Matrisome | LOC100823805 | 12947000 | 19779000 | 8820100  |
| Non-Matrisome | Non-Matrisome | HSP90B1      | 12911000 | 10433000 | 12631000 |
| Non-Matrisome | Non-Matrisome | LOC100514326 | 12417000 | 8167600  | 7448900  |
| Non-Matrisome | Non-Matrisome | ILK          | 12289000 | 5677500  | 6480600  |
| Non-Matrisome | Non-Matrisome | RPL6         | 12255000 | 18143000 | 11099000 |
| Non-Matrisome | Non-Matrisome | ATPSA1       | 12147000 | 11900000 | 9144100  |
| Non-Matrisome | Non-Matrisome | RPSA         | 12020000 | 12100000 | 11860000 |
| Non-Matrisome | Non-Matrisome | TLN1         | 12003000 | 8886300  | 8523300  |
| Non-Matrisome | Non-Matrisome | LOC100525692 | 11680000 | 11158000 | 8944900  |
| Non-Matrisome | Non-Matrisome | ITGB1        | 11574000 | 11750000 | 9887900  |
| Non-Matrisome | Non-Matrisome | HBP15/L22    | 11504000 | 13083000 | 11661000 |
| Non-Matrisome | Non-Matrisome | LOC100158003 | 11369000 | 9523500  | 8252300  |
| Non-Matrisome | Non-Matrisome | LOC733637    | 11148000 | 9912300  | 8038100  |
| Non-Matrisome | Non-Matrisome | YWHAH        | 10604000 | 12474000 | 11813000 |
| Non-Matrisome | Non-Matrisome | HSP70        | 10474000 | 10079000 | 8659700  |
| Non-Matrisome | Non-Matrisome | LOC100738909 | 10201000 | 4217600  | 4672200  |
| Non-Matrisome | Non-Matrisome | RPL31        | 10181000 | 12324000 | 11691000 |
| Non-Matrisome | Non-Matrisome | SMTN         | 10118000 | 7172200  | 4339700  |
| Non-Matrisome | Non-Matrisome | CRYAB        | 10035000 | 12717000 | 8611000  |
| Non-Matrisome | Non-Matrisome | LOC12084     | 10012000 | 9402200  | 9847300  |
| Non-Matrisome | Non-Matrisome | EIF5A        | 9857400  | 6124800  | 7447000  |
| Non-Matrisome | Non-Matrisome | ATP5B        | 9849200  | 8175000  | 8311700  |
| Non-Matrisome | Non-Matrisome | LOC100513063 | 9811900  | 11934000 | 9318500  |
| Non-Matrisome | Non-Matrisome | SET          | 9800000  | 9806000  | 7139200  |
| Non-Matrisome | Non-Matrisome | RTN4         | 9655800  | 7425400  | 8143700  |
| Non-Matrisome | Non-Matrisome | PRKCDDBP     | 9577200  | 6399100  | 6671100  |
| Non-Matrisome | Non-Matrisome | TPM4         | 9288100  | 8968800  | 8776600  |
| Non-Matrisome | Non-Matrisome | NPM1         | 9095900  | 11530000 | 10010000 |
| Non-Matrisome | Non-Matrisome | ST13         | 9032000  | 6087100  | 5965700  |
| Non-Matrisome | Non-Matrisome | LOC100626145 | 8997200  | 5967500  | 9337300  |
| Non-Matrisome | Non-Matrisome | LOC100739437 | 8873500  | 8041300  | 8232000  |
| Non-Matrisome | Non-Matrisome | PYGM         | 8798900  | 5493500  | 3933000  |
| Non-Matrisome | Non-Matrisome | LOC102162202 | 8754800  | 2597000  | 1465600  |
| Non-Matrisome | Non-Matrisome | CDS9         | 8680300  | 7783600  | 7735700  |
| Non-Matrisome | Non-Matrisome | ARPC4        | 8607300  | 5146300  | 5009400  |
| Non-Matrisome | Non-Matrisome | LOC100736718 | 8546800  | 7007900  | 4449600  |
| Non-Matrisome | Non-Matrisome | CALR         | 8381300  | 8591600  | 7614600  |
| Non-Matrisome | Non-Matrisome | C3           | 8154100  | 6266800  | 4051900  |
| Non-Matrisome | Non-Matrisome | H3F3A        | 7910000  | 2119600  | 0        |
| Non-Matrisome | Non-Matrisome | RPL7         | 7871200  | 8180700  | 8891000  |
| Non-Matrisome | Non-Matrisome | LOC100620439 | 7824600  | 10331000 | 2417300  |
| Non-Matrisome | Non-Matrisome | LOC100626701 | 7580600  | 4794000  | 4885700  |
| Non-Matrisome | Non-Matrisome | VDAC2        | 7550000  | 5887800  | 5920400  |
| Non-Matrisome | Non-Matrisome | HSPA5        | 7546900  | 7755100  | 5416100  |
| Non-Matrisome | Non-Matrisome | SORBS1       | 7425900  | 5882600  | 6531800  |
| Non-Matrisome | Non-Matrisome | MYADM        | 7433500  | 4311400  | 4675400  |
| Non-Matrisome | Non-Matrisome | RPS6         | 7418300  | 7234000  | 3298800  |
| Non-Matrisome | Non-Matrisome | PPIA         | 7341800  | 7480000  | 6041400  |
| Non-Matrisome | Non-Matrisome | SYNPO2       | 7304700  | 5119500  | 4362200  |
| Non-Matrisome | Non-Matrisome | RPL27        | 7130600  | 6162700  | 4701100  |
| Non-Matrisome | Non-Matrisome | HSPA8        | 7075900  | 7124800  | 4911200  |
| Non-Matrisome | Non-Matrisome | FMO1         | 6986600  | 5681500  | 7933900  |
| Non-Matrisome | Non-Matrisome | CKAP4        | 6816700  | 11834000 | 7932100  |
| Non-Matrisome | Non-Matrisome | DSTN         | 6809700  | 1868000  | 1101200  |
| Non-Matrisome | Non-Matrisome | LOC100739307 | 6770800  | 7879400  | 9562800  |
| Non-Matrisome | Non-Matrisome | OLFML1       | 6604900  | 9966800  | 7762500  |
| Non-Matrisome | Non-Matrisome | PLP2         | 6595200  | 4438600  | 7264400  |
| Non-Matrisome | Non-Matrisome | CTCFB11      | 6576900  | 4194100  | 5871200  |
| Non-Matrisome | Non-Matrisome | ITGA5        | 6493200  | 5977400  | 3440200  |
| Non-Matrisome | Non-Matrisome | LOC100525245 | 6417100  | 2467100  | 4079900  |
| Non-Matrisome | Non-Matrisome | RPS9         | 6320900  | 4347000  | 3477800  |
| Non-Matrisome | Non-Matrisome | RPL34        | 6282100  | 6968300  | 6991400  |
| Non-Matrisome | Non-Matrisome | GNAI2        | 6207000  | 8008800  | 7855600  |
| Non-Matrisome | Non-Matrisome | RPS20        | 6101300  | 2135900  | 6033300  |
| Non-Matrisome | Non-Matrisome | RPL4         | 6092800  | 6068400  | 5126600  |
| Non-Matrisome | Non-Matrisome | PALLD        | 6049800  | 4570500  | 3078100  |
| Non-Matrisome | Non-Matrisome | RPL18A       | 6004600  | 8395900  | 1559400  |
| Non-Matrisome | Non-Matrisome | RPS16        | 5976300  | 5620000  | 7255900  |
| Non-Matrisome | Non-Matrisome | PDIAG        | 5908700  | 7246400  | 6400500  |
| Non-Matrisome | Non-Matrisome | CDB1         | 5861000  | 6708800  | 7182100  |
| Non-Matrisome | Non-Matrisome | HNRNPK       | 5759500  | 6554100  | 6766000  |
| Non-Matrisome | Non-Matrisome | KRT8         | 5734900  | 7481200  | 10156000 |
| Non-Matrisome | Non-Matrisome | RPL19        | 5665700  | 4005700  | 2104300  |
| Non-Matrisome | Non-Matrisome | RPL21        | 5523200  | 6320800  | 4271200  |
| Non-Matrisome | Non-Matrisome | RPS8         | 5381700  | 3851300  | 2070600  |
| Non-Matrisome | Non-Matrisome | PDI3A        | 5379200  | 7403900  | 3726900  |
| Non-Matrisome | Non-Matrisome | RPL3         | 5354800  | 3594800  | 2641000  |
| Non-Matrisome | Non-Matrisome | HNRNPA2B1    | 5316400  | 5397600  | 5734300  |
| Non-Matrisome | Non-Matrisome | IDH2         | 5282400  | 5365800  | 4548800  |
| Non-Matrisome | Non-Matrisome | NME2         | 5276900  | 203570   | 255730   |
| Non-Matrisome | Non-Matrisome | RPL13        | 5261100  | 2708300  | 1799100  |
| Non-Matrisome | Non-Matrisome | FERMT2       | 5140100  | 2181860  | 1987720  |
| Non-Matrisome | Non-Matrisome | 487H         | 4870000  | 6374300  | 4413300  |
| Non-Matrisome | Non-Matrisome | LOC100514785 | 48767300 | 4193300  | 4078700  |
| Non-Matrisome | Non-Matrisome | ZYX          | 4764900  | 3474000  | 2597700  |
| Non-Matrisome | Non-Matrisome | RPL8         | 4727600  | 7233900  | 7689900  |
| Non-Matrisome | Non-Matrisome | RIPPLY2      | 4642300  | 0        | 1303700  |
| Non-Matrisome | Non-Matrisome | BANF1        | 4440100  | 4357500  | 2815700  |
| Non-Matrisome | Non-Matrisome | PTMA         | 4425000  | 0        | 0        |
| Non-Matrisome | Non-Matrisome | MYO1C        | 4404900  | 3800900  | 3907200  |
| Non-Matrisome | Non-Matrisome | LOC100626041 | 4347000  | 3635300  | 3801500  |
| Non-Matrisome | Non-Matrisome | SPTAN1       | 4284100  | 2689800  | 2563400  |
| Non-Matrisome | Non-Matrisome | PCBP1        | 4280600  | 4650000  | 1258000  |
| Non-Matrisome | Non-Matrisome | OLFML3       | 4194900  | 5086300  | 4084000  |
| Non-Matrisome | Non-Matrisome | LOC100621379 | 4104800  | 8189100  | 12576000 |
| Non-Matrisome | Non-Matrisome | SLC25A6      | 4103500  | 2347000  | 1736600  |
| Non-Matrisome | Non-Matrisome | SELENBP1     | 4009500  | 2743800  | 2580500  |
| Non-Matrisome | Non-Matrisome | SEPT2        | 3981600  | 4059500  | 2619400  |
| Non-Matrisome | Non-Matrisome | LOC100738863 | 3949600  | 2959900  | 3105800  |
| Non-Matrisome | Non-Matrisome | VDAC1        | 3940200  | 985410   | 1485600  |
| Non-Matrisome | Non-Matrisome | H2AFY        | 3893200  | 1857100  | 3694500  |
| Non-Matrisome | Non-Matrisome | CAPN2        | 3811700  | 2637100  | 3222200  |
| Non-Matrisome | Non-Matrisome | ARPC2        | 3810100  | 2512000  | 2002500  |
| Non-Matrisome | Non-Matrisome | ACSL6        | 3722000  | 3855100  | 3939000  |
| Non-Matrisome | Non-Matrisome | PURA         | 3686400  | 2129500  | 708100   |
| Non-Matrisome | Non-Matrisome | SLC25A3      | 3643800  | 4528300  | 2027900  |
| Non-Matrisome | Non-Matrisome | DAD1         | 3617400  | 5107200  | 4847400  |
| Non-Matrisome | Non-Matrisome | TXNDC5       | 3585600  | 2667700  | 1376400  |

|               |               |              |         |         |         |
|---------------|---------------|--------------|---------|---------|---------|
| Non-Matrisome | Non-Matrisome | EEF2         | 3525600 | 2520200 | 3242500 |
| Non-Matrisome | Non-Matrisome | MAOA         | 3523300 | 5991900 | 1758900 |
| Non-Matrisome | Non-Matrisome | LMNA         | 3522300 | 1820000 | 9867200 |
| Non-Matrisome | Non-Matrisome | RPL11        | 3514200 | 2892300 | 2177900 |
| Non-Matrisome | Non-Matrisome | TKT          | 3505500 | 4035800 | 4379000 |
| Non-Matrisome | Non-Matrisome | RPS13        | 3463900 | 4620600 | 2643800 |
| Non-Matrisome | Non-Matrisome | RPLP0        | 3425400 | 3970700 | 2920700 |
| Non-Matrisome | Non-Matrisome | SEPT11       | 3390800 | 5107800 | 4046700 |
| Non-Matrisome | Non-Matrisome | RFS2E        | 3384500 | 3831200 | 3498600 |
| Non-Matrisome | Non-Matrisome | RPL12        | 3317600 | 4859200 | 4032000 |
| Non-Matrisome | Non-Matrisome | AHNAK        | 3317400 | 1959100 | 2028900 |
| Non-Matrisome | Non-Matrisome | RPS11        | 3317200 | 3213700 | 1919200 |
| Non-Matrisome | Non-Matrisome | TNK1         | 3298100 | 2773800 | 3107300 |
| Non-Matrisome | Non-Matrisome | RPL24        | 3297100 | 2318100 | 2658200 |
| Non-Matrisome | Non-Matrisome | ANPEP        | 3279700 | 3668300 | 2743900 |
| Non-Matrisome | Non-Matrisome | PRDX2        | 3233200 | 2602000 | 3601800 |
| Non-Matrisome | Non-Matrisome | RTN3         | 3178200 | 3070200 | 3265400 |
| Non-Matrisome | Non-Matrisome | LOC100525453 | 3127100 | 1123000 | 1823900 |
| Non-Matrisome | Non-Matrisome | RPS4         | 3024200 | 4231900 | 2219100 |
| Non-Matrisome | Non-Matrisome | CAPZA1       | 2990200 | 2681500 | 658090  |
| Non-Matrisome | Non-Matrisome | H1FX         | 2949300 | 2351800 | 1463600 |
| Non-Matrisome | Non-Matrisome | GNG12        | 2946900 | 2990800 | 1923400 |
| Non-Matrisome | Non-Matrisome | RPS5         | 2940700 | 1986800 | 4226200 |
| Non-Matrisome | Non-Matrisome | LOC100823241 | 2858300 | 4814900 | 0       |
| Non-Matrisome | Non-Matrisome | DPYSL2       | 2780600 | 3742000 | 3043300 |
| Non-Matrisome | Non-Matrisome | ACTR3        | 2767400 | 2462200 | 1640000 |
| Non-Matrisome | Non-Matrisome | LOC100738983 | 2756200 | 1847600 | 1249100 |
| Non-Matrisome | Non-Matrisome | CDH13        | 2753900 | 3800300 | 1453700 |
| Non-Matrisome | Non-Matrisome | RPLS3        | 2718400 | 2823600 | 1625700 |
| Non-Matrisome | Non-Matrisome | DOCK9        | 2630700 | 1918300 | 1908000 |
| Non-Matrisome | Non-Matrisome | HNRNPA3      | 2574600 | 1278500 | 236410  |
| Non-Matrisome | Non-Matrisome | ANP32A       | 2557800 | 2767300 | 3696700 |
| Non-Matrisome | Non-Matrisome | RPS7         | 2443600 | 2691900 | 4387900 |
| Non-Matrisome | Non-Matrisome | CLTC         | 2376900 | 2530700 | 1625500 |
| Non-Matrisome | Non-Matrisome | LOC100519984 | 2318200 | 1735300 | 621260  |
| Non-Matrisome | Non-Matrisome | PRDX4        | 2300800 | 2307000 | 3043500 |
| Non-Matrisome | Non-Matrisome | SSR4         | 2284200 | 2022100 | 1929100 |
| Non-Matrisome | Non-Matrisome | CDC37        | 2279600 | 2316100 | 1122000 |
| Non-Matrisome | Non-Matrisome | BASP1        | 2276200 | 3603300 | 1308600 |
| Non-Matrisome | Non-Matrisome | LOC102165939 | 2256500 | 1526700 | 1307600 |
| Non-Matrisome | Non-Matrisome | LOC102166965 | 2251000 | 3694500 | 2260900 |
| Non-Matrisome | Non-Matrisome | VCP          | 2235510 | 1779430 | 524810  |
| Non-Matrisome | Non-Matrisome | SFN          | 2205300 | 2097900 | 2602300 |
| Non-Matrisome | Non-Matrisome | SORBS2       | 2147300 | 2283300 | 2625500 |
| Non-Matrisome | Non-Matrisome | RPL13A       | 2128300 | 2471500 | 3990800 |
| Non-Matrisome | Non-Matrisome | RPS23        | 2093400 | 1935000 | 878570  |
| Non-Matrisome | Non-Matrisome | RPL17        | 2071500 | 1155300 | 688130  |
| Non-Matrisome | Non-Matrisome | PDI4A        | 2058800 | 2005500 | 3102600 |
| Non-Matrisome | Non-Matrisome | AKAP12       | 1998200 | 677580  | 658680  |
| Non-Matrisome | Non-Matrisome | RPN2         | 1985200 | 2626900 | 2138200 |
| Non-Matrisome | Non-Matrisome | GNAO1        | 1978400 | 1619600 | 689880  |
| Non-Matrisome | Non-Matrisome | GNB2L1       | 1965500 | 585810  | 322150  |
| Non-Matrisome | Non-Matrisome | TPH3         | 1958500 | 2727400 | 2510700 |
| Non-Matrisome | Non-Matrisome | PDLIM3       | 1952200 | 1679300 | 2272900 |
| Non-Matrisome | Non-Matrisome | CAPZB        | 1952200 | 1559400 | 308110  |
| Non-Matrisome | Non-Matrisome | LDHA         | 1937000 | 683320  | 1395000 |
| Non-Matrisome | Non-Matrisome | TES          | 1936500 | 0       | 965680  |
| Non-Matrisome | Non-Matrisome | MBOAT1       | 1924200 | 0       | 3211800 |
| Non-Matrisome | Non-Matrisome | PARVA        | 1911500 | 637270  | 1760300 |
| Non-Matrisome | Non-Matrisome | TFRS1        | 1876200 | 1622700 | 2356300 |
| Non-Matrisome | Non-Matrisome | RPL14        | 1856000 | 4974800 | 3192800 |
| Non-Matrisome | Non-Matrisome | HNRNPD       | 1750800 | 2359400 | 1392400 |
| Non-Matrisome | Non-Matrisome | SOOR         | 1717300 | 1106300 | 772910  |
| Non-Matrisome | Non-Matrisome | RPL9         | 1713700 | 455180  | 342950  |
| Non-Matrisome | Non-Matrisome | REEP5        | 1684900 | 0       | 0       |
| Non-Matrisome | Non-Matrisome | LOC100622330 | 1674900 | 855410  | 1049000 |
| Non-Matrisome | Non-Matrisome | HNRNPF       | 1659000 | 1945800 | 89470   |
| Non-Matrisome | Non-Matrisome | ARHGDI1      | 1632300 | 897210  | 2762300 |
| Non-Matrisome | Non-Matrisome | PPP1CB       | 1616500 | 2697500 | 2061000 |
| Non-Matrisome | Non-Matrisome | RPS17        | 1599000 | 1612800 | 0       |
| Non-Matrisome | Non-Matrisome | RCN3         | 1569200 | 992900  | 1284400 |
| Non-Matrisome | Non-Matrisome | CFB          | 1507000 | 0       | 0       |
| Non-Matrisome | Non-Matrisome | RPLP2        | 1483600 | 3556500 | 1096500 |
| Non-Matrisome | Non-Matrisome | GOT2         | 1475000 | 1599400 | 1377900 |
| Non-Matrisome | Non-Matrisome | TMEM109      | 1447500 | 1607200 | 1514300 |
| Non-Matrisome | Non-Matrisome | CAMK2G       | 1415400 | 886300  | 306230  |
| Non-Matrisome | Non-Matrisome | PDCD6        | 1412900 | 0       | 0       |
| Non-Matrisome | Non-Matrisome | LOC102161427 | 1368700 | 1546000 | 0       |
| Non-Matrisome | Non-Matrisome | TMED9        | 1350700 | 0       | 1518600 |
| Non-Matrisome | Non-Matrisome | LIMS2        | 1336600 | 2292600 | 1870000 |
| Non-Matrisome | Non-Matrisome | RPS3A        | 1333400 | 4473600 | 3327300 |
| Non-Matrisome | Non-Matrisome | TUBB2B       | 1305100 | 1930000 | 1770700 |
| Non-Matrisome | Non-Matrisome | LMCD1        | 1301600 | 788940  | 631720  |
| Non-Matrisome | Non-Matrisome | RPN1         | 1300200 | 4134700 | 3592200 |
| Non-Matrisome | Non-Matrisome | NONO         | 1281000 | 1152100 | 2707300 |
| Non-Matrisome | Non-Matrisome | HP1BP3       | 1192600 | 201270  | 278300  |
| Non-Matrisome | Non-Matrisome | RAB10        | 1181200 | 1855000 | 404190  |
| Non-Matrisome | Non-Matrisome | ACTR1A       | 1170500 | 877170  | 262850  |
| Non-Matrisome | Non-Matrisome | LOC100524748 | 1145900 | 0       | 572340  |
| Non-Matrisome | Non-Matrisome | LMNB2        | 1144800 | 1619100 | 212330  |
| Non-Matrisome | Non-Matrisome | ATP1A2       | 1135200 | 772480  | 974660  |
| Non-Matrisome | Non-Matrisome | ATP1A1       | 1107100 | 3006500 | 1417100 |
| Non-Matrisome | Non-Matrisome | DHX9         | 1076100 | 862340  | 244140  |
| Non-Matrisome | Non-Matrisome | HNRNPU       | 1069000 | 1117100 | 1159400 |
| Non-Matrisome | Non-Matrisome | NOO1         | 1062200 | 2608800 | 1366900 |
| Non-Matrisome | Non-Matrisome | DDX17        | 1031900 | 462380  | 901740  |
| Non-Matrisome | Non-Matrisome | HNRNPO       | 1011100 | 913420  | 621740  |
| Non-Matrisome | Non-Matrisome | PGAM2        | 1000900 | 1730300 | 0       |
| Non-Matrisome | Non-Matrisome | NEFH         | 976050  | 1519300 | 1363300 |
| Non-Matrisome | Non-Matrisome | PGM1         | 954480  | 1068000 | 897950  |
| Non-Matrisome | Non-Matrisome | APOA2        | 954480  | 0       | 0       |
| Non-Matrisome | Non-Matrisome | PCBP2        | 945760  | 0       | 320370  |
| Non-Matrisome | Non-Matrisome | LOC100624417 | 938730  | 0       | 1343200 |
| Non-Matrisome | Non-Matrisome | ALDH2        | 933520  | 355690  | 865820  |
| Non-Matrisome | Non-Matrisome | GSR          | 932630  | 337700  | 0       |
| Non-Matrisome | Non-Matrisome | CALU         | 929650  | 545080  | 445410  |
| Non-Matrisome | Non-Matrisome | ATL3         | 924740  | 635790  | 735040  |
| Non-Matrisome | Non-Matrisome | LOC100737457 | 899940  | 776350  | 535960  |
| Non-Matrisome | Non-Matrisome | ADP2B1       | 893940  | 426660  | 593760  |
| Non-Matrisome | Non-Matrisome | HDH1         | 892420  | 806240  | 643560  |
| Non-Matrisome | Non-Matrisome | IDH1         | 873570  | 0       | 824810  |
| Non-Matrisome | Non-Matrisome | ARL6IP5      | 872550  | 515780  | 503420  |
| Non-Matrisome | Non-Matrisome | HSP90AB1     | 864090  | 979640  | 1069700 |
| Non-Matrisome | Non-Matrisome | EFHD2        | 852150  | 0       | 708160  |
| Non-Matrisome | Non-Matrisome | CORO1B       | 849270  | 632240  | 1234300 |
| Non-Matrisome | Non-Matrisome | EZR          | 837320  | 1103100 | 578750  |
| Non-Matrisome | Non-Matrisome | C14H10orf58  | 822730  | 1328700 | 672170  |
| Non-Matrisome | Non-Matrisome | COX411       | 815360  | 0       | 0       |
| Non-Matrisome | Non-Matrisome | EHD1         | 787850  | 1097000 | 473630  |
| Non-Matrisome | Non-Matrisome | CANX         | 786380  | 827080  | 238730  |
| Non-Matrisome | Non-Matrisome | TOP1         | 738100  | 0       | 0       |
| Non-Matrisome | Non-Matrisome | IQGAP1       | 696200  | 838890  | 297940  |
| Non-Matrisome | Non-Matrisome | TPPP3        | 684480  | 1754400 | 563950  |
| Non-Matrisome | Non-Matrisome | ADD1         | 644160  | 280290  | 433410  |
| Non-Matrisome | Non-Matrisome | ATP2A2       | 618610  | 417690  | 370440  |
| Non-Matrisome | Non-Matrisome | TAF15        | 602590  | 0       | 195980  |
| Non-Matrisome | Non-Matrisome | TN-X         | 582090  | 710120  | 587200  |
| Non-Matrisome | Non-Matrisome | CTCF2        | 562700  | 233110  | 643130  |
| Non-Matrisome | Non-Matrisome | CAPZA2       | 538090  | 0       | 302160  |
| Non-Matrisome | Non-Matrisome | GLUD1        | 520580  | 543390  | 0       |
| Non-Matrisome | Non-Matrisome | LOC100736695 | 518730  | 2289200 | 719870  |
| Non-Matrisome | Non-Matrisome | ACTR2        | 515910  | 2036000 | 138670  |
| Non-Matrisome | Non-Matrisome | KATNAL2      | 510420  | 198790  | 325550  |
| Non-Matrisome | Non-Matrisome | SRI          | 508250  | 1626300 | 4905900 |
| Non-Matrisome | Non-Matrisome | TUBB6        | 501280  | 628880  | 648730  |

|               |               |              |        |         |          |
|---------------|---------------|--------------|--------|---------|----------|
| Non-Matrisome | Non-Matrisome | LOC100625760 | 479980 | 0       | 0        |
| Non-Matrisome | Non-Matrisome | RPS19        | 466900 | 1189100 | 3098700  |
| Non-Matrisome | Non-Matrisome | EIF4A1       | 456460 | 367030  | 342610   |
| Non-Matrisome | Non-Matrisome | RFS10        | 453760 | 250200  | 0        |
| Non-Matrisome | Non-Matrisome | OTUB1        | 452940 | 177680  | 0        |
| Non-Matrisome | Non-Matrisome | SRSF7        | 450210 | 699260  | 1396400  |
| Non-Matrisome | Non-Matrisome | CORO1C       | 438820 | 1161800 | 1645600  |
| Non-Matrisome | Non-Matrisome | LMAN2        | 416650 | 0       | 410750   |
| Non-Matrisome | Non-Matrisome | NSD1         | 414050 | 489940  | 385950   |
| Non-Matrisome | Non-Matrisome | COPA         | 402190 | 336120  | 409010   |
| Non-Matrisome | Non-Matrisome | PPP2R1A      | 401380 | 364540  | 159600   |
| Non-Matrisome | Non-Matrisome | SEC11A       | 401250 | 0       | 0        |
| Non-Matrisome | Non-Matrisome | VPS35        | 398570 | 695580  | 363680   |
| Non-Matrisome | Non-Matrisome | TEX15        | 397980 | 433940  | 335900   |
| Non-Matrisome | Non-Matrisome | LOC100739704 | 397410 | 432940  | 898670   |
| Non-Matrisome | Non-Matrisome | PLCE1        | 388270 | 0       | 0        |
| Non-Matrisome | Non-Matrisome | HSD17B10     | 363390 | 299330  | 337770   |
| Non-Matrisome | Non-Matrisome | STT3A        | 351020 | 424030  | 0        |
| Non-Matrisome | Non-Matrisome | VAT1         | 319800 | 0       | 209590   |
| Non-Matrisome | Non-Matrisome | HNRNPR       | 319610 | 134510  | 273220   |
| Non-Matrisome | Non-Matrisome | GSTP1        | 316710 | 511160  | 744900   |
| Non-Matrisome | Non-Matrisome | PGK1         | 308900 | 0       | 258870   |
| Non-Matrisome | Non-Matrisome | HNRNPM       | 305580 | 390760  | 277860   |
| Non-Matrisome | Non-Matrisome | DDOST        | 286150 | 1181800 | 450320   |
| Non-Matrisome | Non-Matrisome | BAG2         | 279170 | 0       | 0        |
| Non-Matrisome | Non-Matrisome | TUFM         | 274190 | 189250  | 180450   |
| Non-Matrisome | Non-Matrisome | SLA-DQB1     | 252830 | 0       | 0        |
| Non-Matrisome | Non-Matrisome | PFKL         | 252450 | 0       | 0        |
| Non-Matrisome | Non-Matrisome | PABPC1       | 242960 | 274980  | 267880   |
| Non-Matrisome | Non-Matrisome | GNAQ         | 242170 | 0       | 0        |
| Non-Matrisome | Non-Matrisome | G6PD         | 228590 | 0       | 0        |
| Non-Matrisome | Non-Matrisome | DDX39A       | 217570 | 985140  | 534190   |
| Non-Matrisome | Non-Matrisome | ATP2B1       | 209830 | 0       | 147060   |
| Non-Matrisome | Non-Matrisome | UBA1         | 206820 | 102280  | 97383    |
| Non-Matrisome | Non-Matrisome | TUBA1A       | 205220 | 268950  | 0        |
| Non-Matrisome | Non-Matrisome | CKM          | 200330 | 1023100 | 264420   |
| Non-Matrisome | Non-Matrisome | HNRNPA1      | 174630 | 144960  | 161890   |
| Non-Matrisome | Non-Matrisome | MSN          | 162410 | 0       | 0        |
| Non-Matrisome | Non-Matrisome | COPB1        | 161100 | 102150  | 287860   |
| Non-Matrisome | Non-Matrisome | C4           | 157990 | 0       | 53630    |
| Non-Matrisome | Non-Matrisome | BYNC1H1      | 149760 | 131550  | 24040    |
| Non-Matrisome | Non-Matrisome | CAPN1        | 148510 | 102290  | 349990   |
| Non-Matrisome | Non-Matrisome | CCT3         | 146480 | 0       | 0        |
| Non-Matrisome | Non-Matrisome | PYGB         | 145610 | 0       | 0        |
| Non-Matrisome | Non-Matrisome | RAB2A        | 143210 | 0       | 100280   |
| Non-Matrisome | Non-Matrisome | LOC100524408 | 128470 | 228300  | 224520   |
| Non-Matrisome | Non-Matrisome | ARHGAP1      | 128200 | 200570  | 185420   |
| Non-Matrisome | Non-Matrisome | PTBP1        | 121560 | 1529400 | 660360   |
| Non-Matrisome | Non-Matrisome | PIP5K1C      | 121130 | 0       | 0        |
| Non-Matrisome | Non-Matrisome | ALDH3A2      | 120250 | 0       | 304990   |
| Non-Matrisome | Non-Matrisome | ARPC3        | 113500 | 360220  | 0        |
| Non-Matrisome | Non-Matrisome | LOC100524170 | 109050 | 349630  | 198950   |
| Non-Matrisome | Non-Matrisome | NANS         | 105910 | 0       | 65462    |
| Non-Matrisome | Non-Matrisome | AP2A1        | 105270 | 0       | 0        |
| Non-Matrisome | Non-Matrisome | DLC1         | 105220 | 31953   | 96034    |
| Non-Matrisome | Non-Matrisome | CFH          | 94622  | 75685   | 0        |
| Non-Matrisome | Non-Matrisome | SDPR         | 74642  | 0       | 0        |
| Non-Matrisome | Non-Matrisome | DDX3X        | 64944  | 113720  | 0        |
| Non-Matrisome | Non-Matrisome | HARDHA       | 61332  | 81343   | 119680   |
| Non-Matrisome | Non-Matrisome | EIF3M1       | 60492  | 81252   | 72766    |
| Non-Matrisome | Non-Matrisome | GANAB        | 52686  | 251340  | 644850   |
| Non-Matrisome | Non-Matrisome | COPB2        | 47636  | 52093   | 24696    |
| Non-Matrisome | Non-Matrisome | KPNB1        | 32401  | 155820  | 26410    |
| Non-Matrisome | Non-Matrisome | CLASP2       | 32305  | 18211   | 0        |
| Non-Matrisome | Non-Matrisome | COPS3        | 29915  | 0       | 32197    |
| Non-Matrisome | Non-Matrisome | RPL26        | 0      | 1395200 | 13811000 |
| Non-Matrisome | Non-Matrisome | LOC100523901 | 0      | 5536700 | 3387600  |
| Non-Matrisome | Non-Matrisome | LOC100736977 | 0      | 4185000 | 0        |
| Non-Matrisome | Non-Matrisome | HNRNPH1      | 0      | 1895300 | 4731100  |
| Non-Matrisome | Non-Matrisome | RPS24        | 0      | 1654700 | 0        |
| Non-Matrisome | Non-Matrisome | TMEM108      | 0      | 1385200 | 746090   |
| Non-Matrisome | Non-Matrisome | CAPNS1       | 0      | 1201700 | 896380   |
| Non-Matrisome | Non-Matrisome | NME3         | 0      | 1116100 | 0        |
| Non-Matrisome | Non-Matrisome | LOC100622258 | 0      | 999640  | 0        |
| Non-Matrisome | Non-Matrisome | HNRNPL       | 0      | 908960  | 871770   |
| Non-Matrisome | Non-Matrisome | APHO         | 0      | 873180  | 343930   |
| Non-Matrisome | Non-Matrisome | TMX4         | 0      | 851340  | 0        |
| Non-Matrisome | Non-Matrisome | FKBP11       | 0      | 701440  | 395170   |
| Non-Matrisome | Non-Matrisome | CFL2         | 0      | 684840  | 0        |
| Non-Matrisome | Non-Matrisome | MAPRE1       | 0      | 657880  | 889390   |
| Non-Matrisome | Non-Matrisome | TMED10       | 0      | 586060  | 0        |
| Non-Matrisome | Non-Matrisome | LOC100620394 | 0      | 559700  | 0        |
| Non-Matrisome | Non-Matrisome | SNRPA        | 0      | 552080  | 0        |
| Non-Matrisome | Non-Matrisome | ATP5F1       | 0      | 539450  | 0        |
| Non-Matrisome | Non-Matrisome | GSTA2        | 0      | 497490  | 1051900  |
| Non-Matrisome | Non-Matrisome | CHCHD3       | 0      | 494800  | 735910   |
| Non-Matrisome | Non-Matrisome | MAPK1        | 0      | 420240  | 0        |
| Non-Matrisome | Non-Matrisome | MCT7         | 0      | 358660  | 0        |
| Non-Matrisome | Non-Matrisome | ACO2         | 0      | 352770  | 359160   |
| Non-Matrisome | Non-Matrisome | LOC100737374 | 0      | 331930  | 360200   |
| Non-Matrisome | Non-Matrisome | GNAS         | 0      | 277320  | 310380   |
| Non-Matrisome | Non-Matrisome | HSPA12B      | 0      | 252060  | 0        |
| Non-Matrisome | Non-Matrisome | HSPD1        | 0      | 216950  | 285130   |
| Non-Matrisome | Non-Matrisome | LOC100518219 | 0      | 199770  | 0        |
| Non-Matrisome | Non-Matrisome | G3BP1        | 0      | 197140  | 0        |
| Non-Matrisome | Non-Matrisome | SLC35F5      | 0      | 192940  | 0        |
| Non-Matrisome | Non-Matrisome | ILF2         | 0      | 163030  | 137530   |
| Non-Matrisome | Non-Matrisome | RRBP1        | 0      | 162110  | 0        |
| Non-Matrisome | Non-Matrisome | GDI1         | 0      | 132430  | 96885    |
| Non-Matrisome | Non-Matrisome | LOC100738401 | 0      | 119800  | 162740   |
| Non-Matrisome | Non-Matrisome | UGDH         | 0      | 109940  | 132530   |
| Non-Matrisome | Non-Matrisome | LOC102166880 | 0      | 77917   | 0        |
| Non-Matrisome | Non-Matrisome | CCT5         | 0      | 0       | 316710   |
| Non-Matrisome | Non-Matrisome | APOA4        | 0      | 0       | 293190   |
| Non-Matrisome | Non-Matrisome | SARS         | 0      | 0       | 281050   |
| Non-Matrisome | Non-Matrisome | LOC102164134 | 0      | 0       | 242010   |
| Non-Matrisome | Non-Matrisome | KCTD12       | 0      | 0       | 181720   |
| Non-Matrisome | Non-Matrisome | SERPINA3-3   | 0      | 0       | 179370   |
| Non-Matrisome | Non-Matrisome | CP           | 0      | 0       | 171880   |
| Non-Matrisome | Non-Matrisome | SEC24D       | 0      | 0       | 164620   |
| Non-Matrisome | Non-Matrisome | ESYT1        | 0      | 0       | 99806    |
| Non-Matrisome | Non-Matrisome | CAMK2D       | 0      | 0       | 45615    |

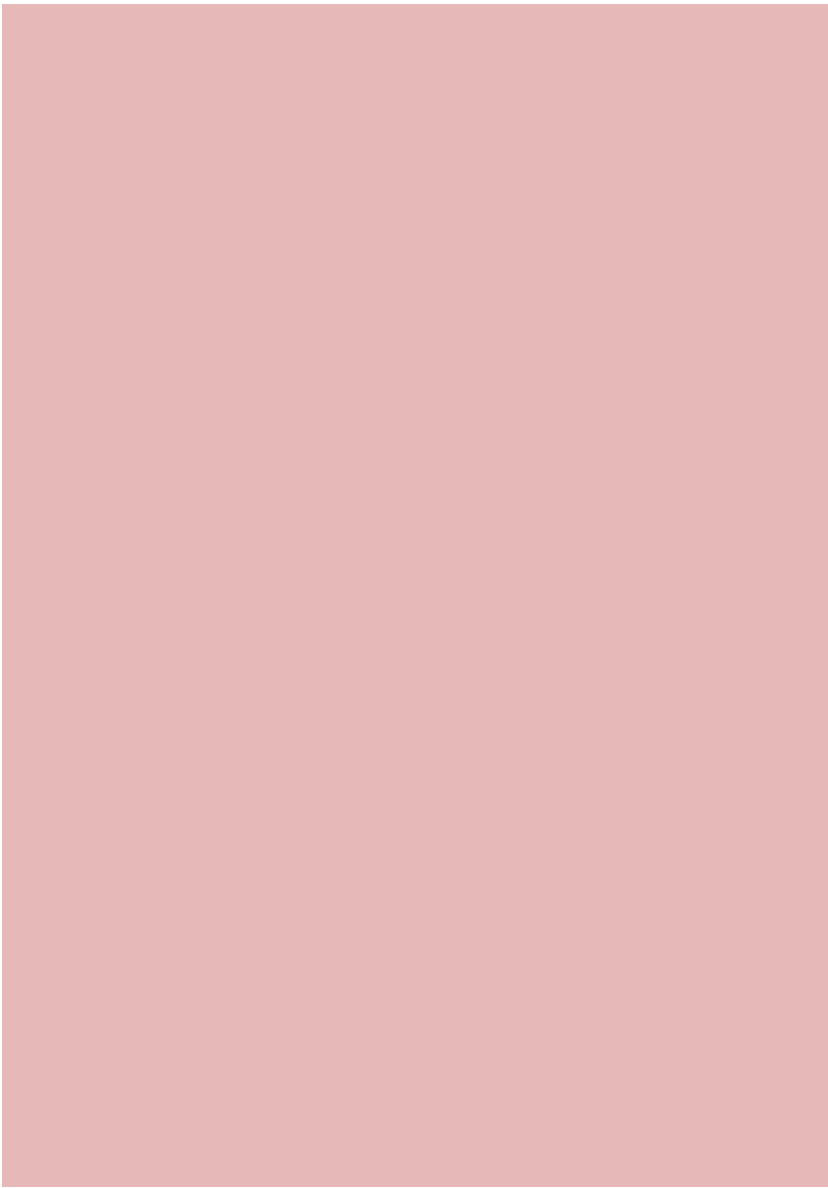

Supplement: NIHMS1004738-supplement-PDF_version_of_table.pdf [file NIHMS1004738-supplement-PDF_version_of_table.pdf]
